# Supplementary material for: Patient-derived olfactory mucosa for study of the non-neuronal contribution to amyotrophic lateral sclerosis pathology
Source: PubMed Central journal article supplement (PMC4459844; doi:10.1111/jcmm.12488), 2015-03-25
Supplement: jcmm0019-1284-sd1.pdf [file jcmm0019-1284-sd1.pdf]

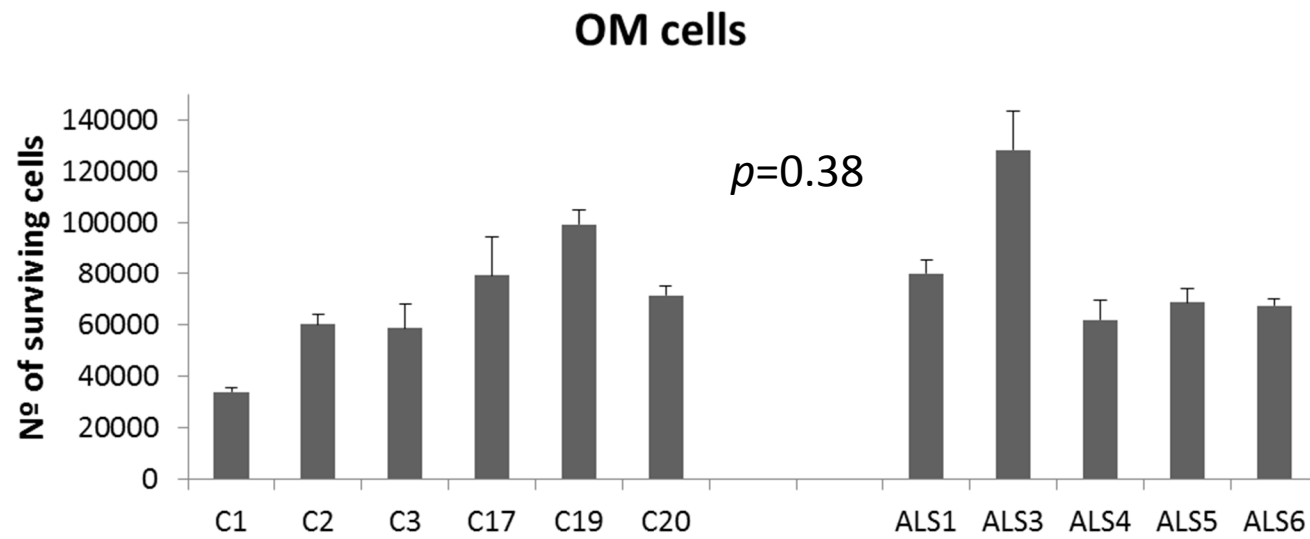

Survival of olfactory mucosa cells after 23 days in culture medium without growth factors
