# Supplementary material for: Patient-derived olfactory mucosa for study of the non-neuronal contribution to amyotrophic lateral sclerosis pathology
Source: PubMed Central journal article supplement (PMC4459844; doi:10.1111/jcmm.12488), 2015-03-25

## Controls

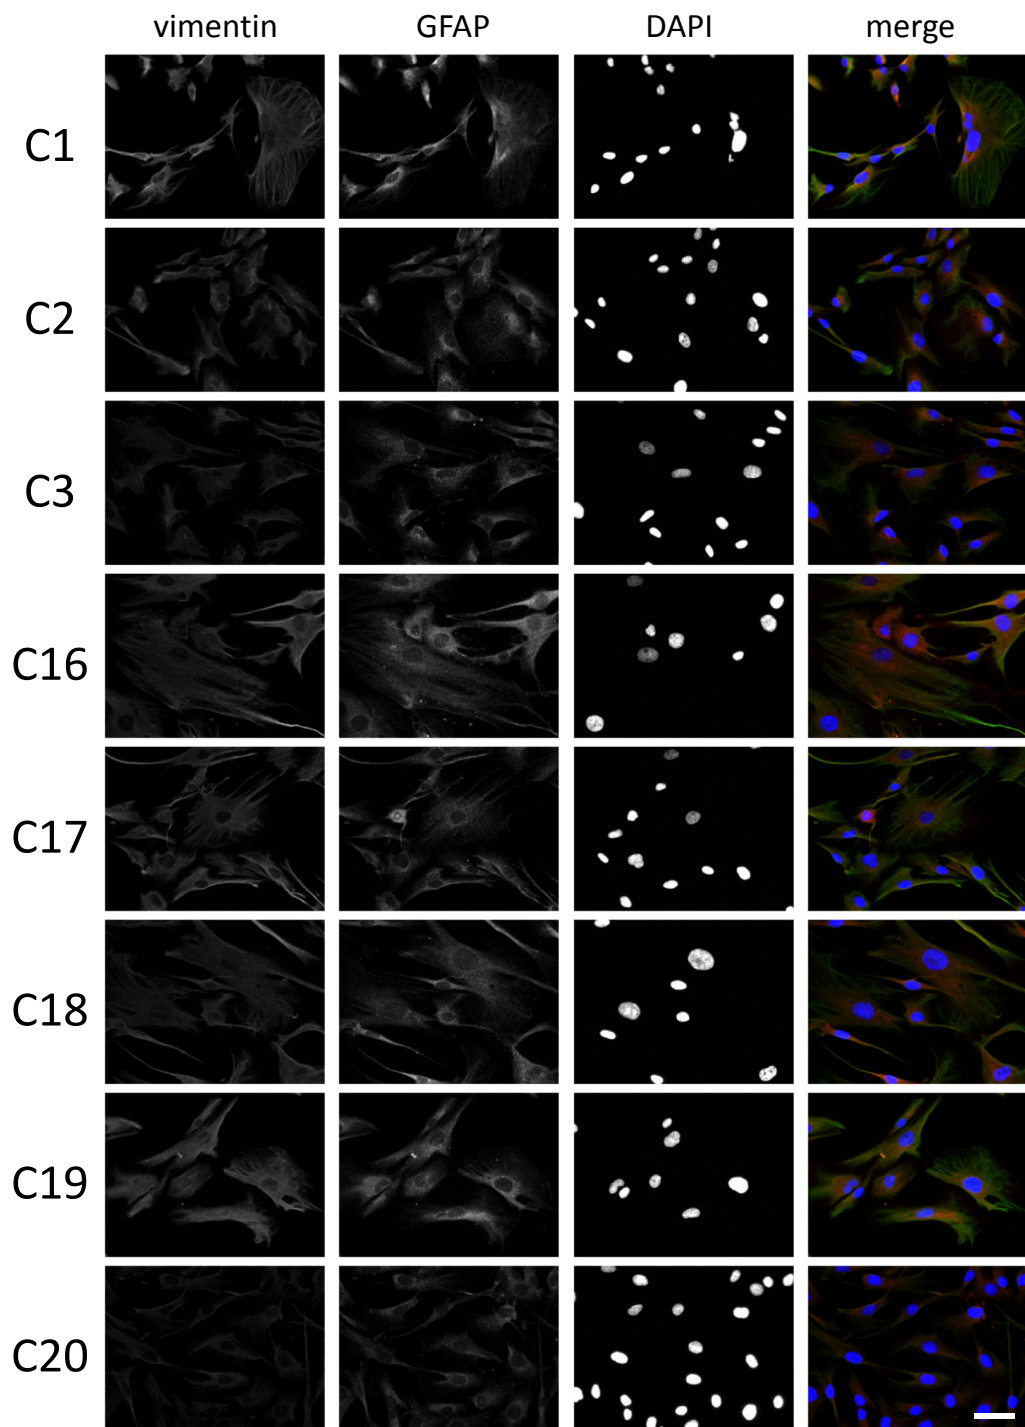

## ALS

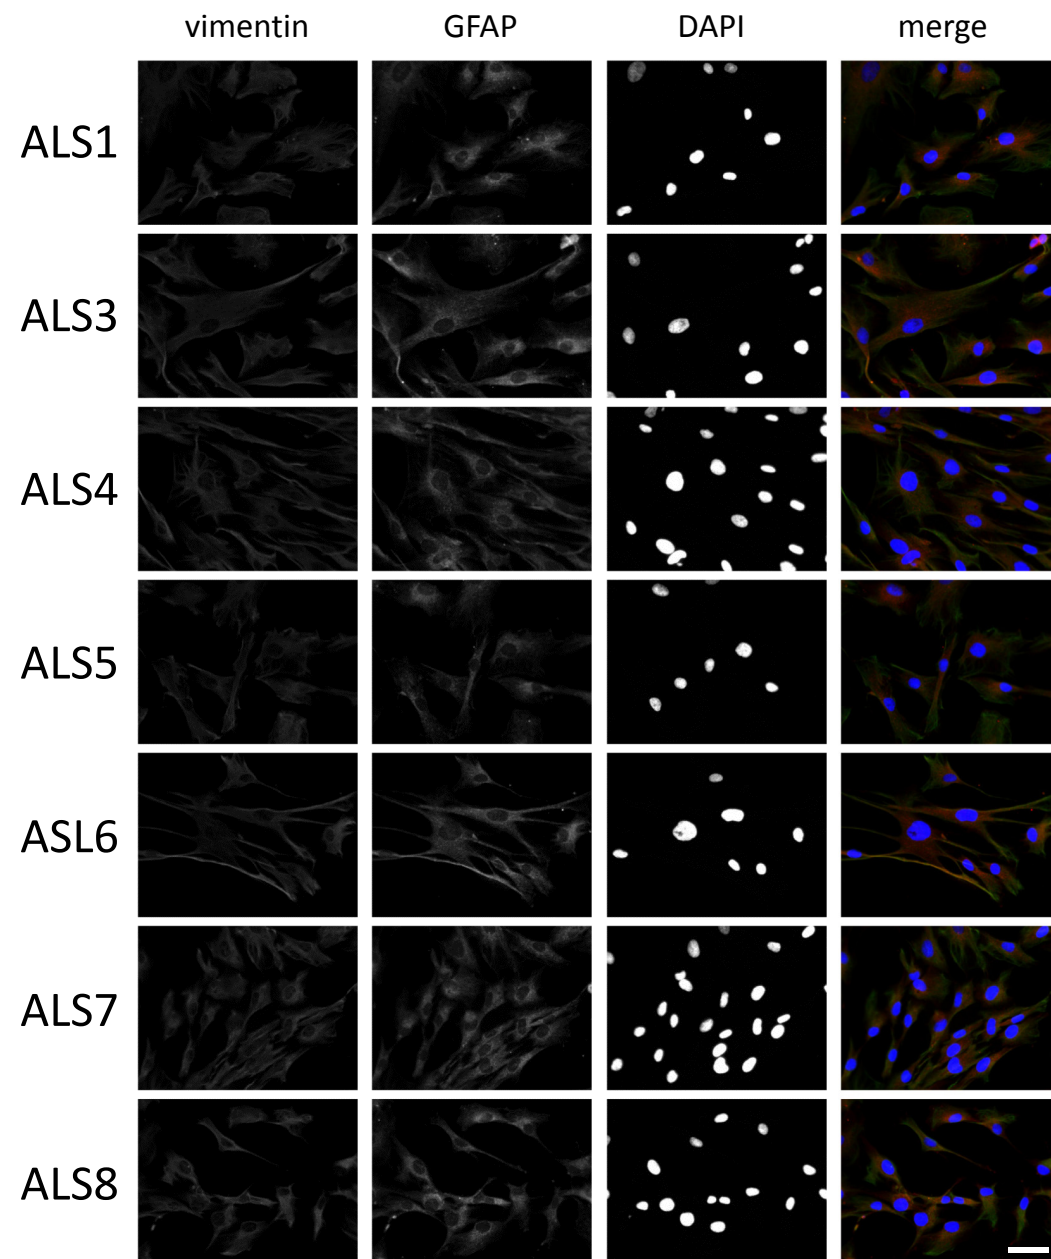

## Controls

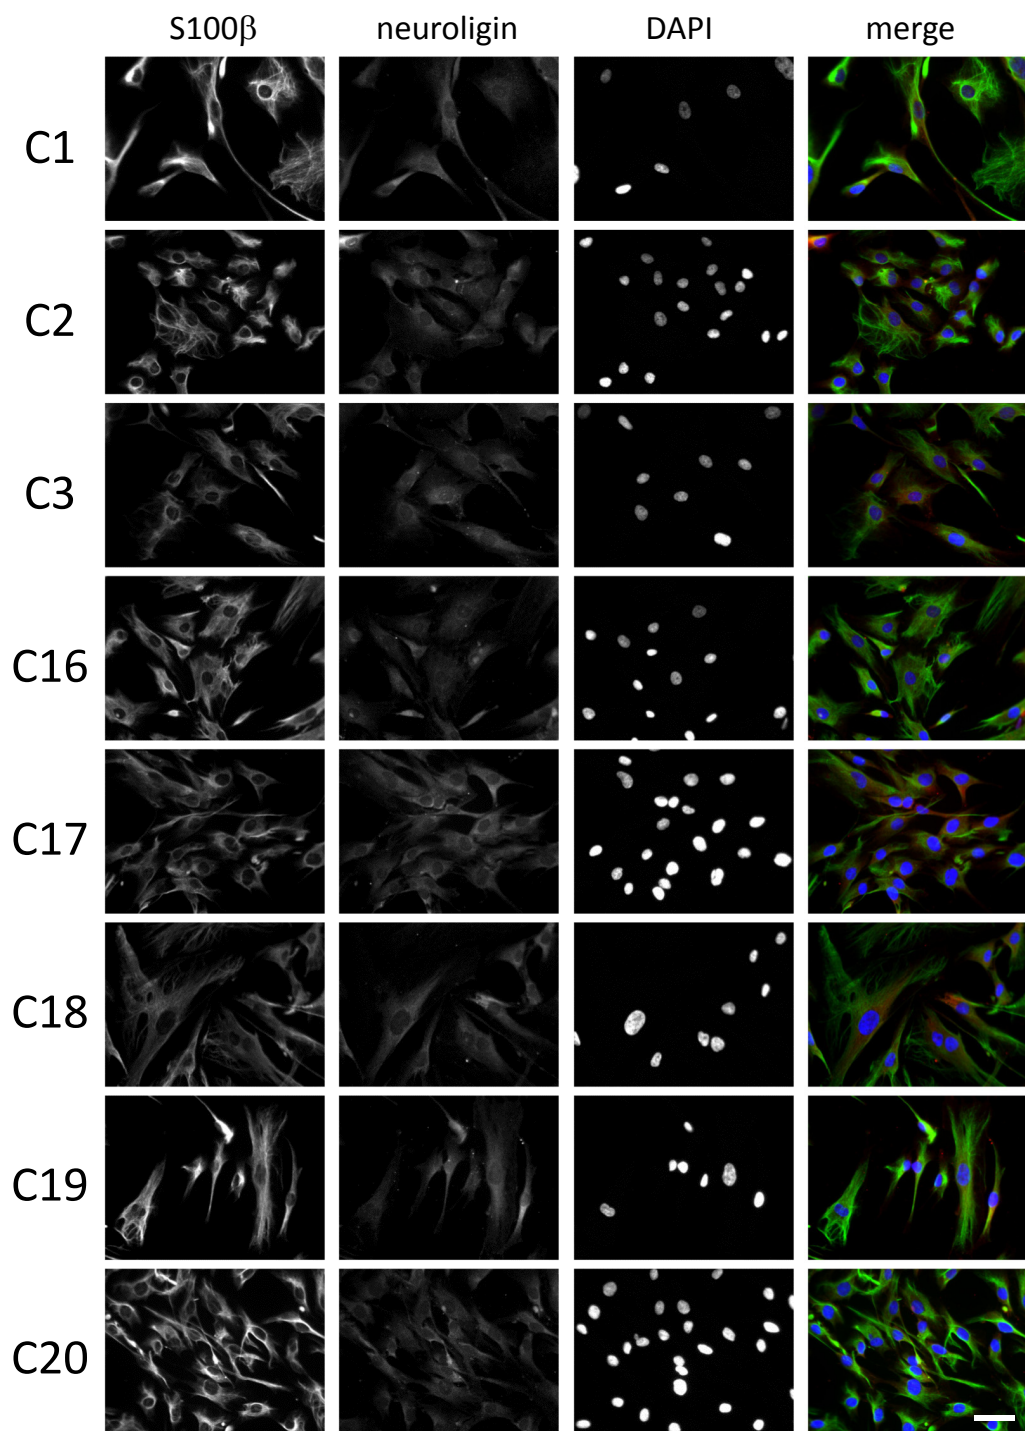

## ALS

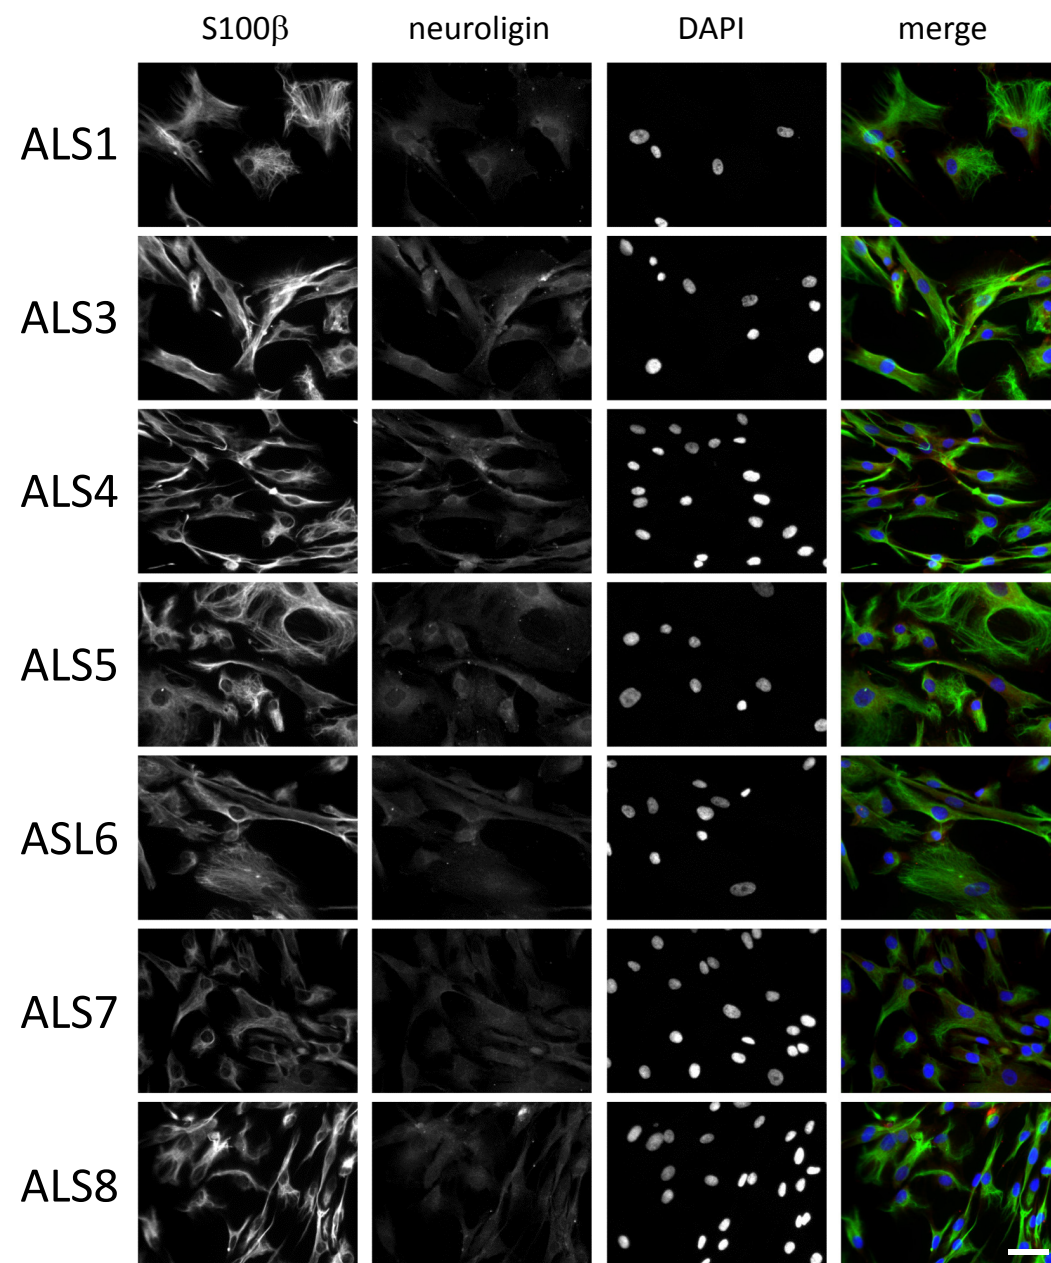

### Controls

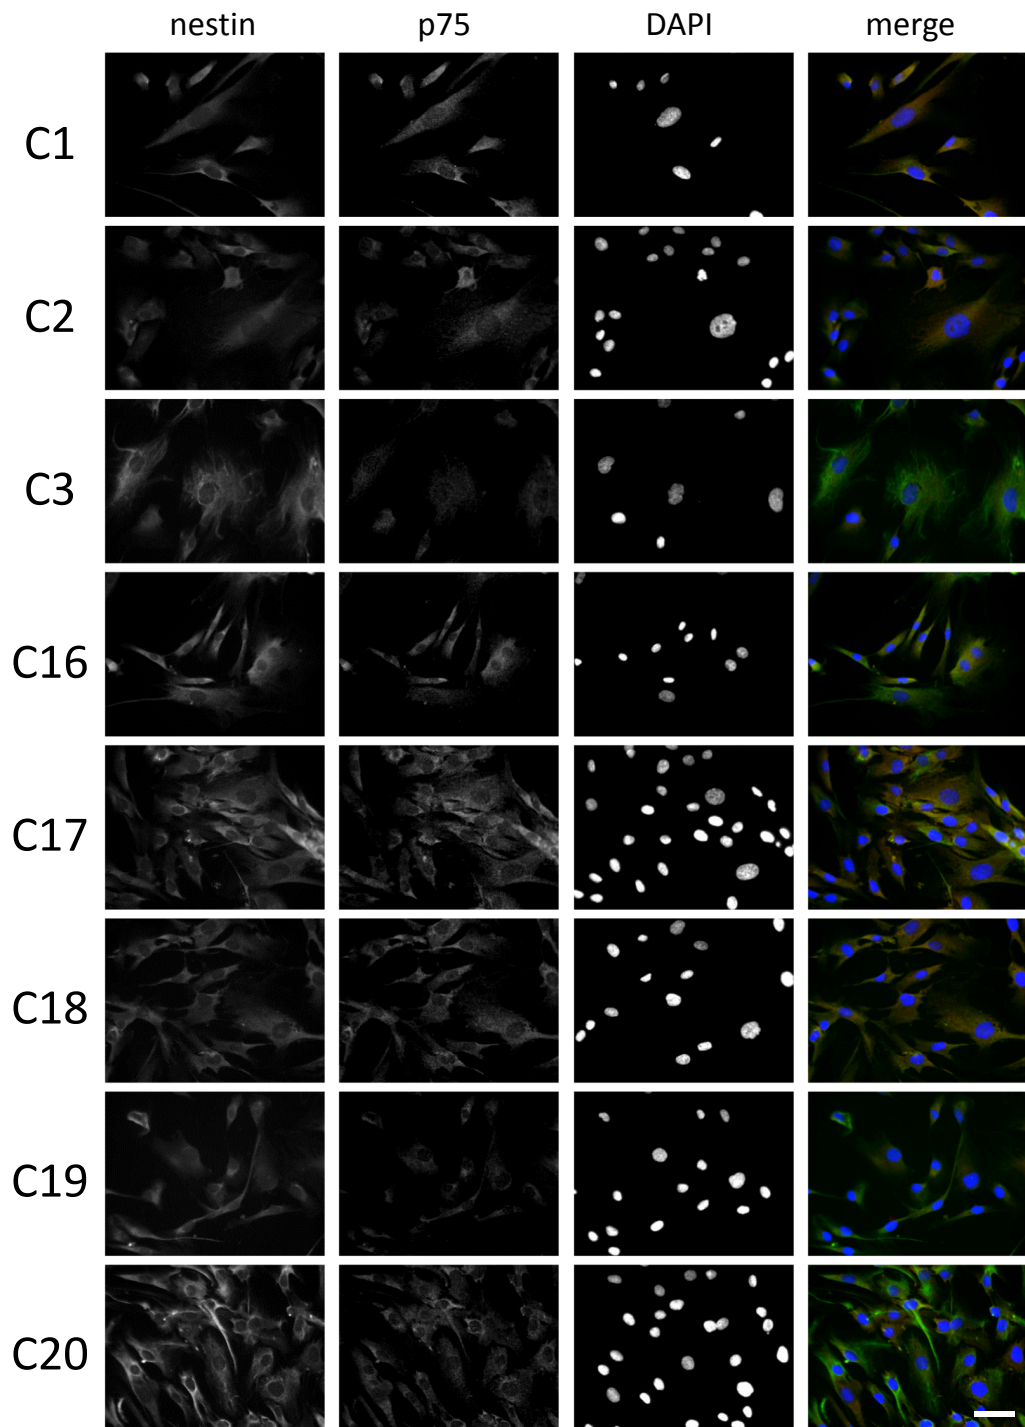

### ALS

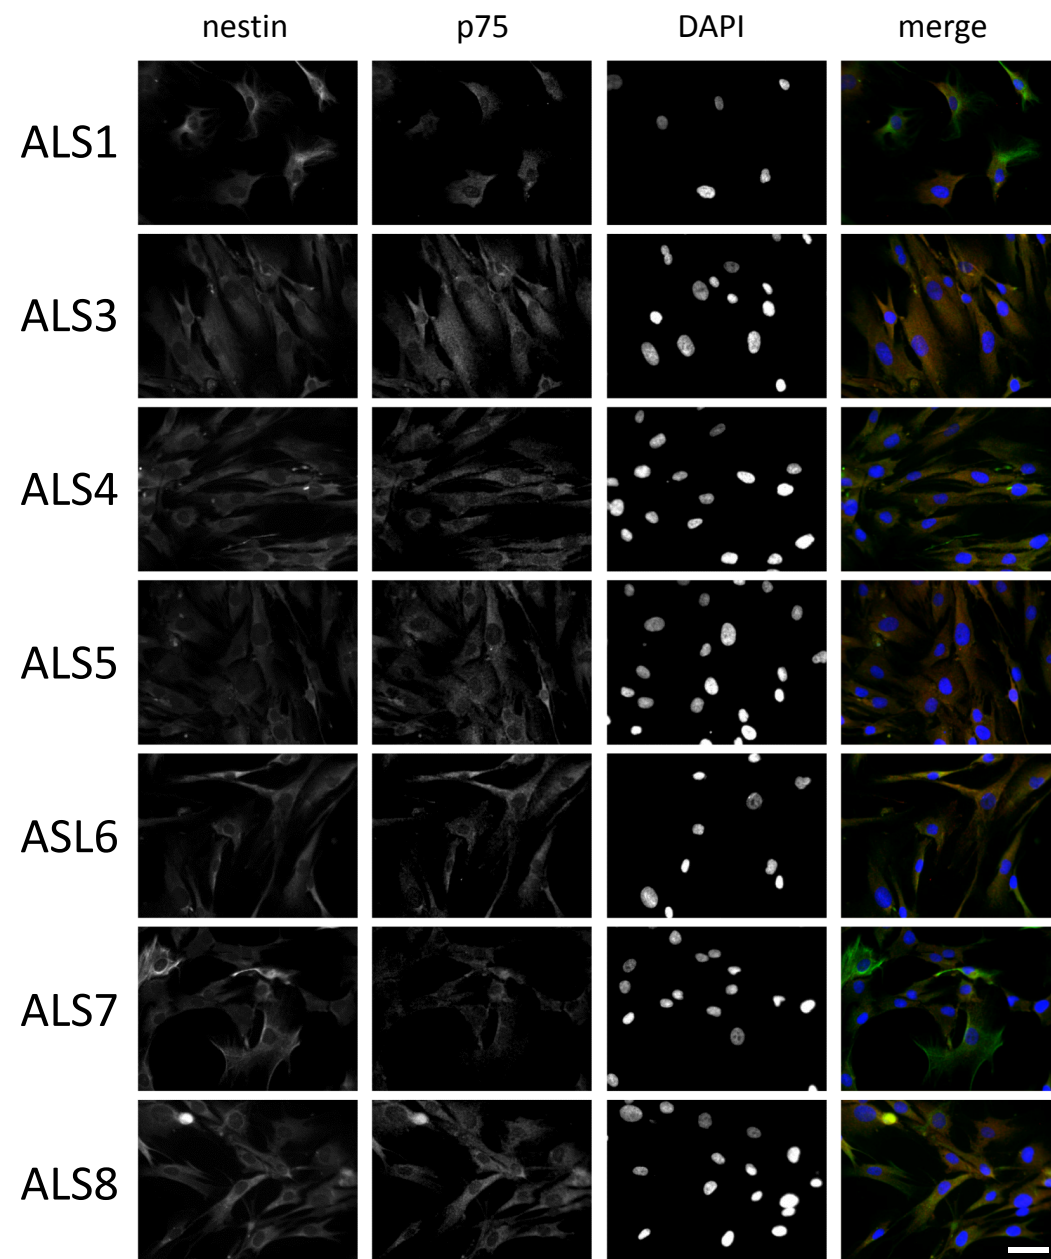

Supplement: jcmm0019-1284-sd2.pdf [file jcmm0019-1284-sd2.pdf]
